# Supplementary material
Source: PubMed Central journal article supplement (PMC5987936)

# Supplemental Figure 1

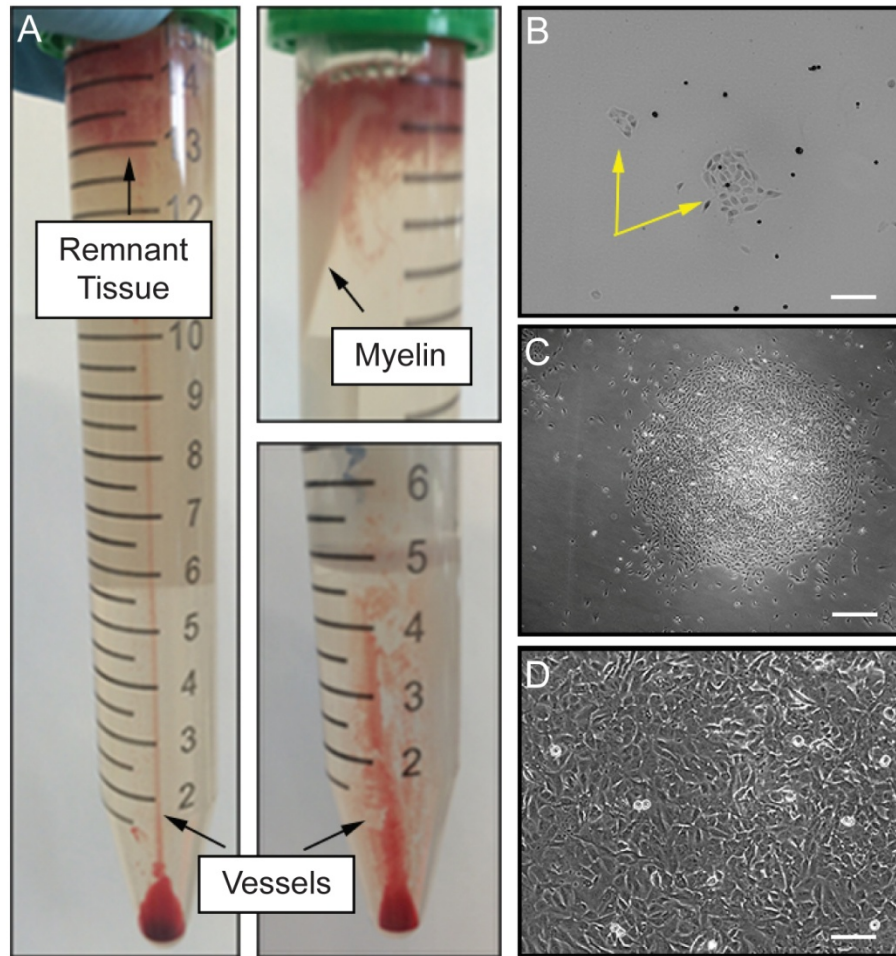

# Supplemental Figure 2

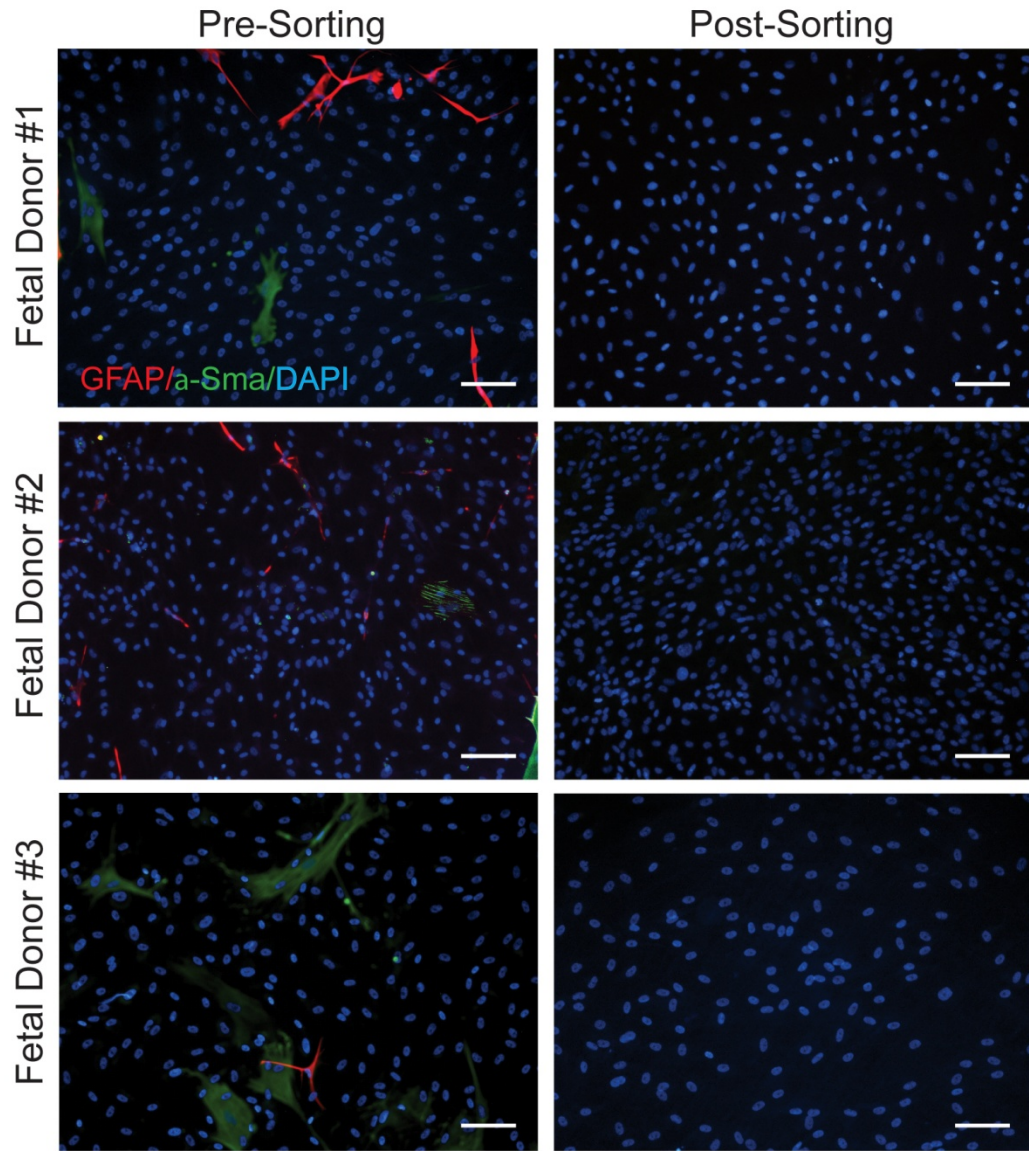

# Supplemental Figure 3

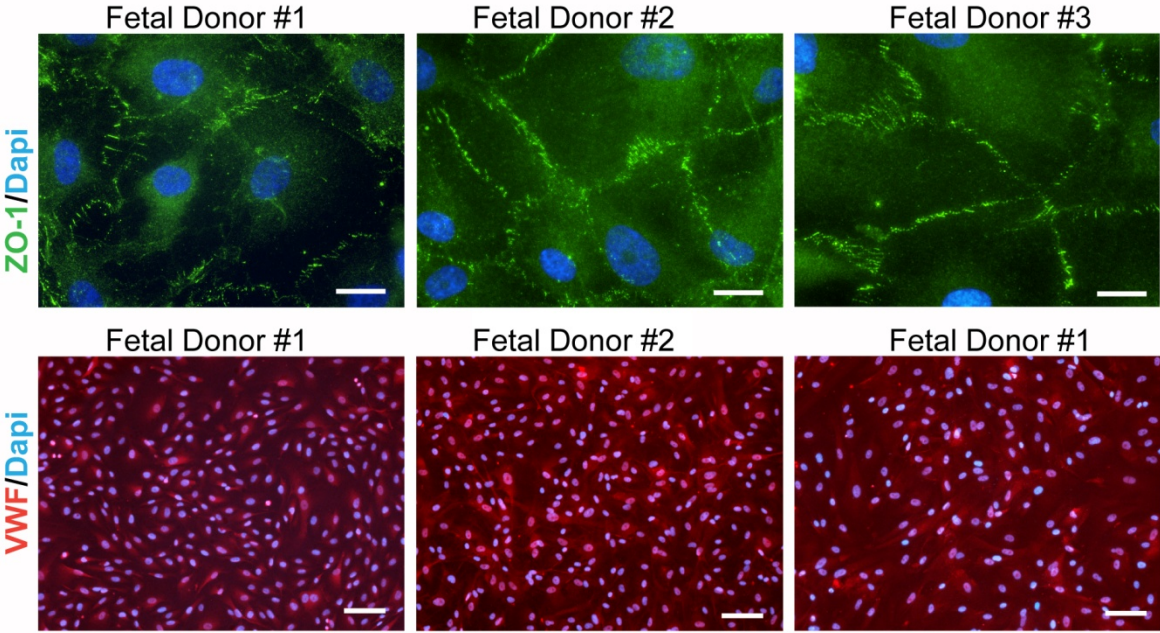

# Supplemental Figure 4

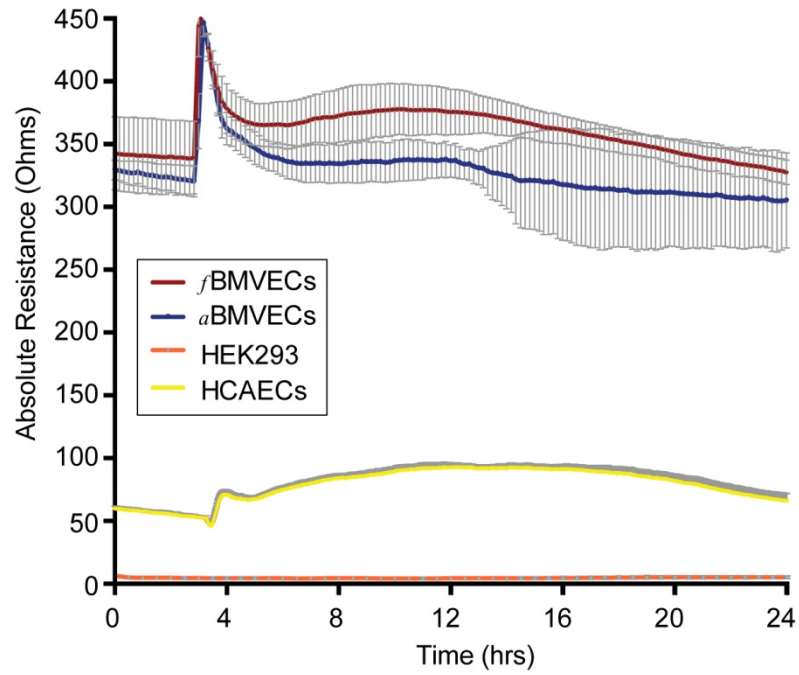



# Supplemental Figure 5

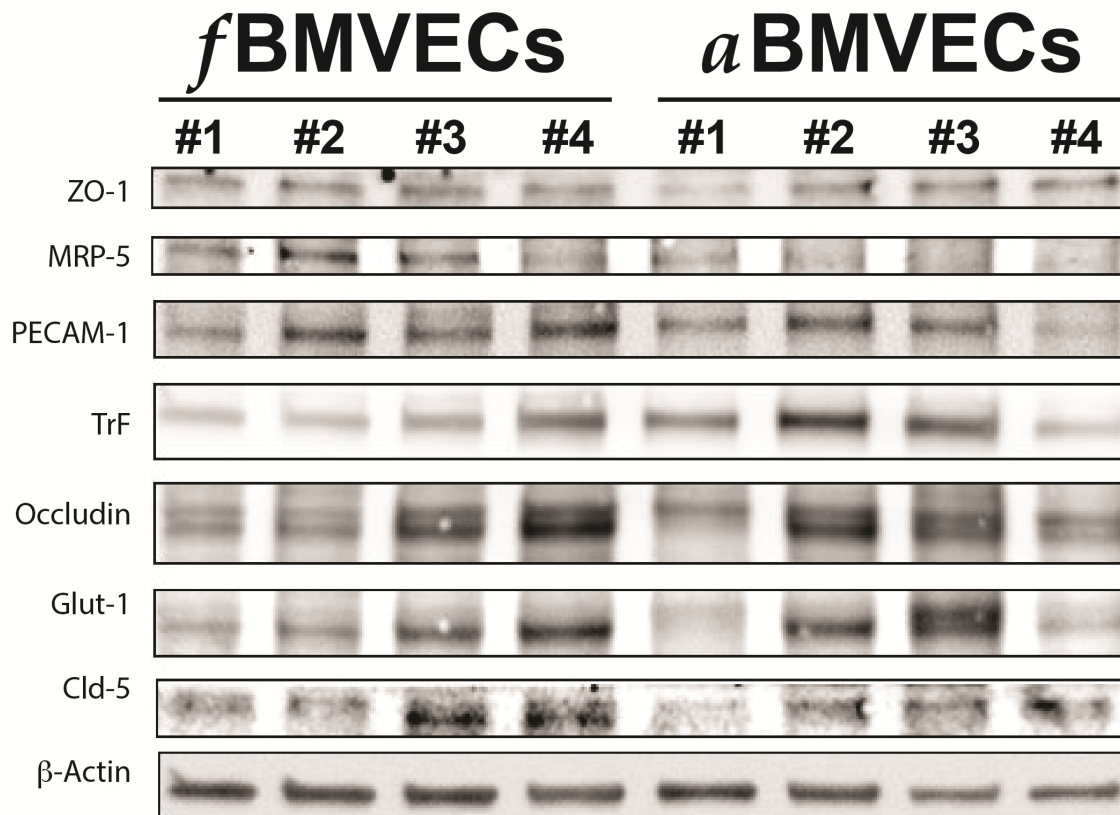

Supplement: JCB708690_supplementary_material1.pdf [file JCB708690_supplementary_material1.pdf]
